# Supplementary material
Source: publisher figshare collection journal article supplement (https://sage.figshare.com/ndownloader/files/20467932)
Supplement: Supplementary file 1 [file 20467932]

## Appendix 1

### BASELINE CHECK - INFO ABOUT THE PARTICIPANT

YES            Are you a Registered Nurse?

YES            Are you qualified to use interRAI?

YES            Have you completed an AIS test?

YES/NO        Have you done a follow up annual AIS competency test?

NO             Have you worked in the same facility as the researcher?

Which age group do you belong to:

<30            30 - 50            >50

M ☐ F ☐

Size of the facility? Beds: .....

Hosp / RH / Dementia

Size of the company? :

Company owns more than two facilities around NZ ? ☐

Company owns 1-2 facilities ☐

How many staff complete interRAI assessments in your facility?

Date:

## Appendix 2

### FINAL INTERVIEW QUESTIONS

1a **Experiences:** Tell me about the interRAI **training** you received. *Venue, trainers, group, time*

1a2 Is it easy to get trained for interRAI in your facility?

1b **Feelings:** How did you feel about the training? *Was it easy or hard for you? Enough?* 1c

**Attitudes:** Would you say you have mostly positive or negative thoughts about the training process?

2a **Experiences:** Tell me about the **interRAI use** in your job. *How often do you use it? Is it easy to use? How long does it take you to complete an assessment? Are you up-to-date with your assessments in your facility?*

2a2 Is interRAI integrated in your existing work or is it something extra that you need to do?

2b **Feelings:** How do you feel about completing an assessment? *Is it easy or hard for you?*

2c **Attitudes:** Would you say you have mostly positive or negative thoughts about completing interRAI assessments?

3a **Experiences:** Tell me about your experience with the **AIS assessment?**

3b **Feelings:** How did you feel about completing AIS? *Was it easy or hard?*

3c **Attitudes:** Would you say you have mostly positive or negative thoughts about completing the AIS test?

4a **Experiences:** How does your **manager support** you in using interRAI?

4a2 How does your **company** support you?

4b **Feelings:** How do you feel about the support that you receive from your manager and/or company? *Is it enough? If not, what could they do better?*

4c **Attitudes:** Would you say you have mostly positive or negative thoughts about the support you receive from your manager and the company?

5a **Experiences:** Tell me about **the support systems** available to you.

*Can you contact a person to help you when needed?*

*Do you have enough computers?*

*Do you have access to IT support?*

*Do you have other resources available (People/technical/books?)*

5b **Feelings**: How do you feel about the support systems available to you? (Is that enough?)

5c **Attitudes**: Would you say you have mostly positive or negative thoughts about the support systems available?

6a **Experiences**: How would you describe your **computer skills**?

6b **Feelings**: How do you feel about your computer skills?

How do you feel about your knowledge about using interRAI?

6c **Attitudes**: Would you say you have mostly positive or negative thoughts towards the use of computer?

7a **Experiences**: How do you believe your **residents benefit** from interRAI?

Do you think learning and using interRAI has been **useful to you personally**?

7b **Feelings**: In what ways is it **worthwhile** to use interRAI?

7c **Attitudes**: Would you say you have mostly positive or negative thoughts about how interRAI affects your performance at work?

## 8 Final question:

In your opinion, what would make it easier to learn and use interRAI?

In your opinion how could interRAI be improved?

What would make your interRAI experience better?
